# Supplementary material for: Erythropoietin and Fibroblast Growth Factor 23 in Autosomal Dominant Polycystic Kidney Disease Patients
Source: PubMed Central journal article supplement — Kidney Int Rep. 2019 Aug 24;4(12):1742–8. doi: 10.1016/j.ekir.2019.08.010 (PMC6895647; doi:10.1016/j.ekir.2019.08.010), 2019-08-24
Supplement: mmc1.pdf [file mmc1.pdf]

# **Erythropoietin and fibroblast growth factor 23 in autosomal dominant polycystic kidney disease patients**

Hanudel MR et al.

## **Supplementary Material:**

|                               |       |
|-------------------------------|-------|
| Supplementary Tables.....     | 2-5   |
| Supplementary Figures.....    | 6-10  |
| Methods.....                  | 11-13 |
| Supplementary References..... | 14-16 |

**Supplementary Table S1:** Multiple linear regression modeling,  
dependent variable: log-transformed C-terminal (total) FGF23 (n=78)

| <b>Model</b> | <b>Independent Variables</b>                                                                                                  | <b>Standardized Coefficient</b>                                                                  | <b>P-value</b>                                                                                 | <b>Variance Inflation Factor</b>                                                     | <b>Adjusted R<sup>2</sup></b> |
|--------------|-------------------------------------------------------------------------------------------------------------------------------|--------------------------------------------------------------------------------------------------|------------------------------------------------------------------------------------------------|--------------------------------------------------------------------------------------|-------------------------------|
| 1            | <b>EPO</b>                                                                                                                    | <b>0.35</b>                                                                                      | <b>0.002</b>                                                                                   | 1.00                                                                                 | 0.11                          |
| 2            | <b>EPO</b><br>Age<br>Sex<br>eGFR<br>Height Adjusted TKV<br>Liver Volume                                                       | <b>0.37</b><br>0.07<br>-0.11<br>-0.05<br>0.08<br>-0.08                                           | <b>0.002</b><br>0.59<br>0.39<br>0.73<br>0.51<br>0.49                                           | 1.06<br>1.39<br>1.27<br>1.50<br>1.23<br>1.17                                         | 0.08                          |
| 3            | <b>EPO</b><br>Age<br>Sex<br>eGFR<br>Height Adjusted TKV<br>Liver Volume<br>Phosphate<br>Calcium<br>PTH<br>1,25D<br>Hemoglobin | <b>0.32</b><br>0.09<br>-0.13<br>0.02<br>0.13<br>-0.12<br>0.17<br>-0.36<br>-0.11<br>-0.28<br>0.04 | <b>0.009</b><br>0.48<br>0.39<br>0.89<br>0.29<br>0.31<br>0.12<br>0.003<br>0.33<br>0.023<br>0.76 | 1.36<br>1.59<br>2.21<br>1.54<br>1.42<br>1.25<br>1.14<br>1.33<br>1.25<br>1.40<br>2.16 | 0.22                          |

EPO: erythropoietin, eGFR: estimated glomerular filtration rate, TKV: total kidney volume,  
PTH: parathyroid hormone, 1,25D: 1,25-dihydroxyvitamin D.

**Supplementary Table S2:** Multiple linear regression modeling, dependent variable: log-transformed intact FGF23 (n=78)

| <b>Model</b> | <b>Independent Variables</b>                                                                                           | <b>Standardized Coefficient</b>                                                           | <b>P-value</b>                                                                       | <b>Variance Inflation Factor</b>                                                     | <b>Adjusted R<sup>2</sup></b> |
|--------------|------------------------------------------------------------------------------------------------------------------------|-------------------------------------------------------------------------------------------|--------------------------------------------------------------------------------------|--------------------------------------------------------------------------------------|-------------------------------|
| 1            | EPO                                                                                                                    | -0.04                                                                                     | 0.73                                                                                 | 1.00                                                                                 | 0.00                          |
| 2            | EPO<br>Age<br>Sex<br>eGFR<br>Height Adjusted TKV<br>Liver Volume                                                       | -0.01<br>0.00<br>-0.22<br>-0.06<br>0.12<br>0.17                                           | 0.96<br>1.00<br>0.07<br>0.64<br>0.34<br>0.15                                         | 1.06<br>1.39<br>1.27<br>1.50<br>1.23<br>1.17                                         | 0.08                          |
| 3            | EPO<br>Age<br>Sex<br>eGFR<br>Height Adjusted TKV<br>Liver Volume<br>Phosphate<br>Calcium<br>PTH<br>1,25D<br>Hemoglobin | -0.00<br>0.04<br>-0.13<br>-0.08<br>0.13<br>0.19<br>0.06<br>0.03<br>-0.13<br>-0.01<br>0.09 | 0.99<br>0.76<br>0.42<br>0.59<br>0.34<br>0.14<br>0.64<br>0.84<br>0.32<br>0.95<br>0.60 | 1.36<br>1.59<br>2.21<br>1.54<br>1.42<br>1.25<br>1.14<br>1.33<br>1.25<br>1.40<br>2.16 | 0.04                          |

EPO: erythropoietin, eGFR: estimated glomerular filtration rate, TKV: total kidney volume, PTH: parathyroid hormone, 1,25D: 1,25-dihydroxyvitamin D.

**Supplementary Table S3:** Multiple linear regression modeling,  
dependent variable: C-terminal (total) FGF23, excluding outlying point (n=77)

| <b>Model</b> | <b>Independent Variables</b>                                                                                                  | <b>Standardized Coefficient</b>                                                                  | <b>P-value</b>                                                                                 | <b>Variance Inflation Factor</b>                                                     | <b>Adjusted R<sup>2</sup></b> |
|--------------|-------------------------------------------------------------------------------------------------------------------------------|--------------------------------------------------------------------------------------------------|------------------------------------------------------------------------------------------------|--------------------------------------------------------------------------------------|-------------------------------|
| 1            | <b>EPO</b>                                                                                                                    | <b>0.27</b>                                                                                      | <b>0.016</b>                                                                                   | 1.00                                                                                 | 0.06                          |
| 2            | <b>EPO</b><br>Age<br>Sex<br>eGFR<br>Height Adjusted TKV<br>Liver Volume                                                       | <b>0.29</b><br>0.05<br>-0.06<br>-0.06<br>0.05<br>-0.09                                           | <b>0.017</b><br>0.69<br>0.66<br>0.68<br>0.67<br>0.46                                           | 1.06<br>1.40<br>1.28<br>1.53<br>1.23<br>1.15                                         | 0.02                          |
| 3            | <b>EPO</b><br>Age<br>Sex<br>eGFR<br>Height Adjusted TKV<br>Liver Volume<br>Phosphate<br>Calcium<br>PTH<br>1,25D<br>Hemoglobin | <b>0.29</b><br>0.08<br>-0.04<br>0.02<br>0.14<br>-0.13<br>0.18<br>-0.38<br>-0.02<br>-0.25<br>0.17 | <b>0.014</b><br>0.57<br>0.80<br>0.89<br>0.28<br>0.27<br>0.12<br>0.002<br>0.87<br>0.044<br>0.28 | 1.25<br>1.58<br>2.24<br>1.58<br>1.41<br>1.24<br>1.14<br>1.33<br>1.25<br>1.40<br>2.14 | 0.18                          |

EPO: erythropoietin, eGFR: estimated glomerular filtration rate, TKV: total kidney volume,  
PTH: parathyroid hormone, 1,25D: 1,25-dihydroxyvitamin D.

**Supplementary Table S4:** Multiple linear regression modeling, dependent variable: intact FGF23, excluding outlying point (n=77)

| Model | Independent Variables                                                                                                  | Standardized Coefficient                                                                 | P-value                                                                              | Variance Inflation Factor                                                            | Adjusted R <sup>2</sup> |
|-------|------------------------------------------------------------------------------------------------------------------------|------------------------------------------------------------------------------------------|--------------------------------------------------------------------------------------|--------------------------------------------------------------------------------------|-------------------------|
| 1     | EPO                                                                                                                    | -0.03                                                                                    | 0.79                                                                                 | 1.00                                                                                 | 0.00                    |
| 2     | EPO<br>Age<br>Sex<br>eGFR<br>Height Adjusted TKV<br>Liver Volume                                                       | 0.01<br>-0.01<br>-0.22<br>-0.05<br>0.11<br>0.04                                          | 0.96<br>0.96<br>0.09<br>0.73<br>0.37<br>0.72                                         | 1.07<br>1.39<br>1.26<br>1.50<br>1.23<br>1.16                                         | 0.01                    |
| 3     | EPO<br>Age<br>Sex<br>eGFR<br>Height Adjusted TKV<br>Liver Volume<br>Phosphate<br>Calcium<br>PTH<br>1,25D<br>Hemoglobin | 0.01<br>0.03<br>-0.07<br>-0.06<br>0.10<br>0.02<br>0.11<br>0.10<br>-0.13<br>-0.15<br>0.09 | 0.93<br>0.84<br>0.67<br>0.69<br>0.48<br>0.85<br>0.39<br>0.47<br>0.32<br>0.28<br>0.61 | 1.36<br>1.60<br>2.20<br>1.54<br>1.42<br>1.26<br>1.14<br>1.33<br>1.26<br>1.43<br>2.16 | 0.01                    |

EPO: erythropoietin, eGFR: estimated glomerular filtration rate, TKV: total kidney volume, PTH: parathyroid hormone, 1,25D: 1,25-dihydroxyvitamin D.

**Supplementary Figure S1: The C-terminal (total) FGF23 and intact FGF23 enzyme-linked immunosorbent assays (ELISA).**

Whereas the C-terminal (total) fibroblast growth factor 23 (FGF23) ELISA detects both the full-length, intact protein and its C-terminal proteolytic fragments, the intact FGF23 assay detects only the full-length form of the hormone.

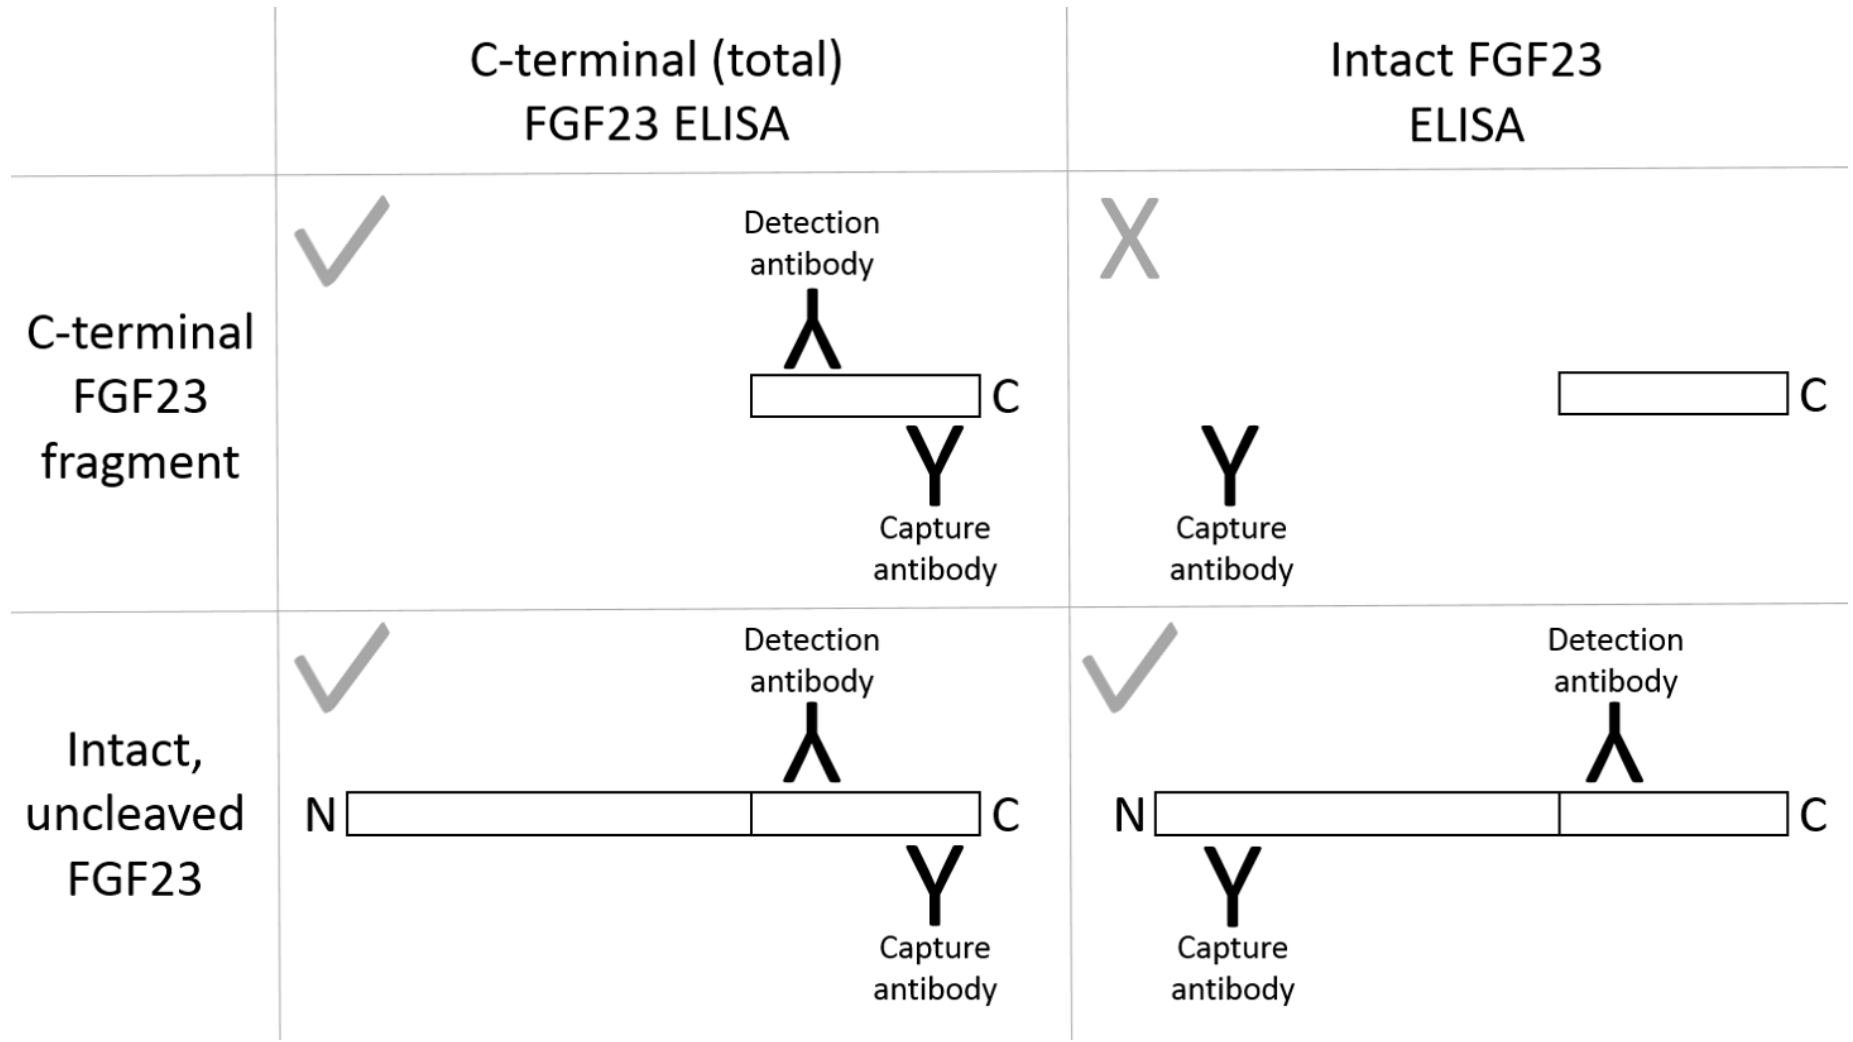

**Supplementary Figure S2: Associations between erythropoietin and log-transformed FGF23 in the ADPKD HALT-PKD Study**

**A cohort.** In patients with autosomal dominant polycystic kidney disease (ADPKD), serum erythropoietin (EPO) levels positively correlated with log-transformed circulating C-terminal (total) fibroblast growth factor 23 (FGF23) concentrations (**Figure S2a**), but not with log-transformed circulating intact FGF23 concentrations (**Figure S2b**).

**a**

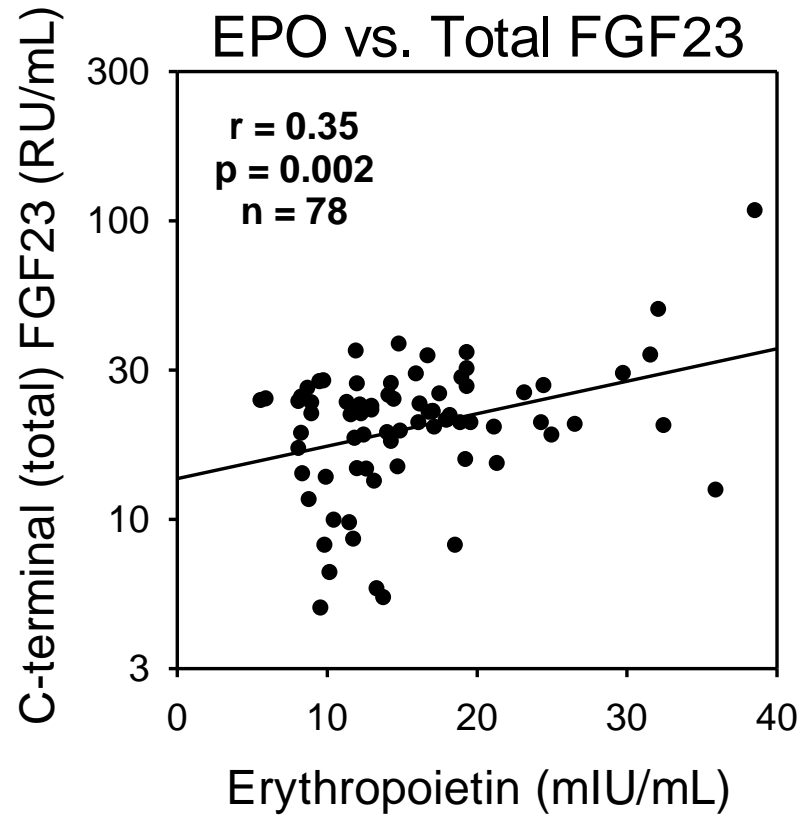

**b**

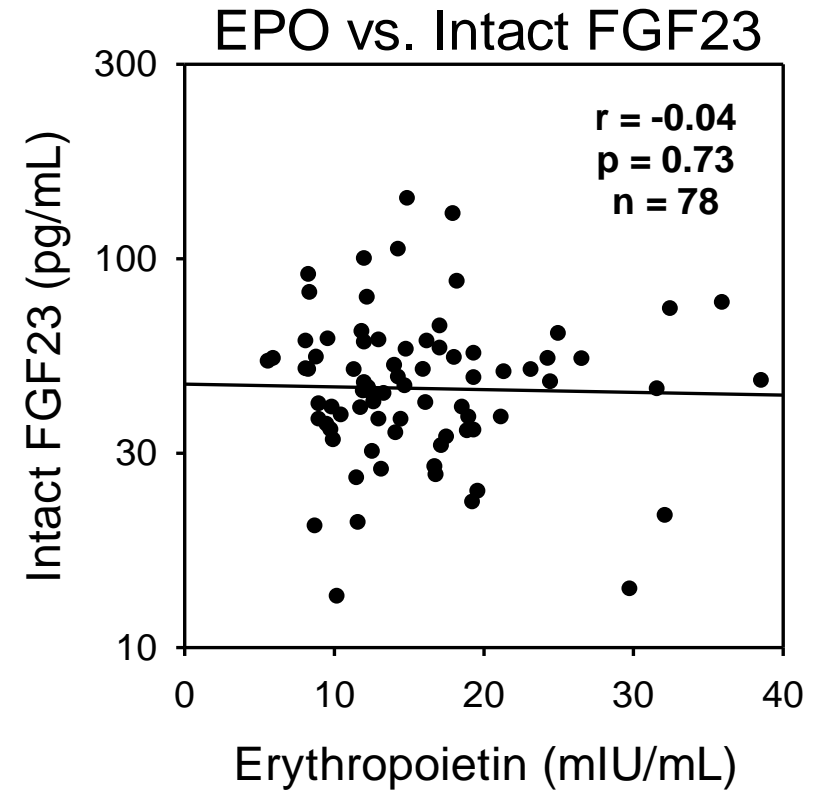

**Supplementary Figure S3: Associations between erythropoietin and FGF23 in the ADPKD HALT-PKD Study A cohort, excluding outlying points.** In patients with autosomal dominant polycystic kidney disease (ADPKD), serum erythropoietin (EPO) levels positively correlated with circulating C-terminal (total) fibroblast growth factor 23 (FGF23) concentrations (**Figure S3a**), but not with circulating intact FGF23 concentrations (**Figure S3b**).

**a**

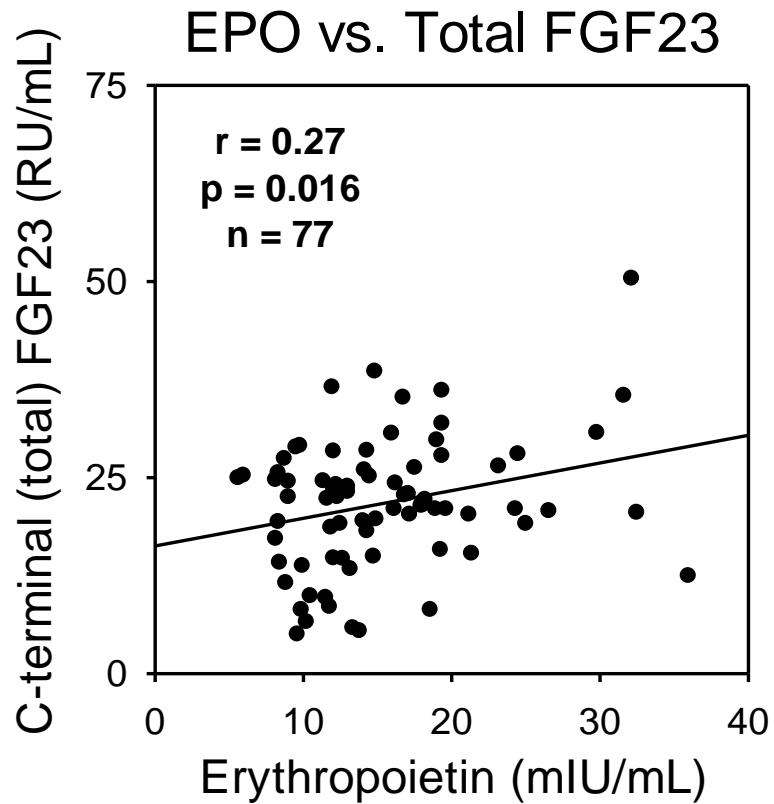

**b**

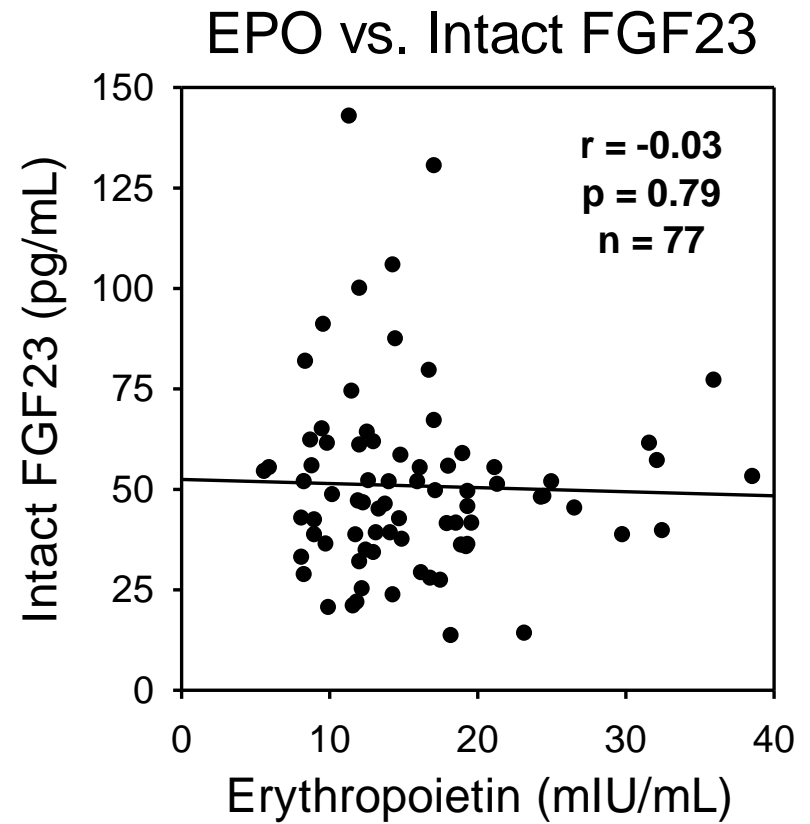



**Supplementary Figure S4: Associations between ferritin and FGF23 in the ADPKD bone biopsy cohort.** In patients with autosomal dominant polycystic kidney disease (ADPKD), serum ferritin levels tended to inversely correlate with circulating C-terminal (total) fibroblast growth factor 23 (FGF23) concentrations (**Figure S4a**), but not with circulating intact FGF23 concentrations (**Figure S4b**) or with bone FGF23 levels (**Figure S4c**).

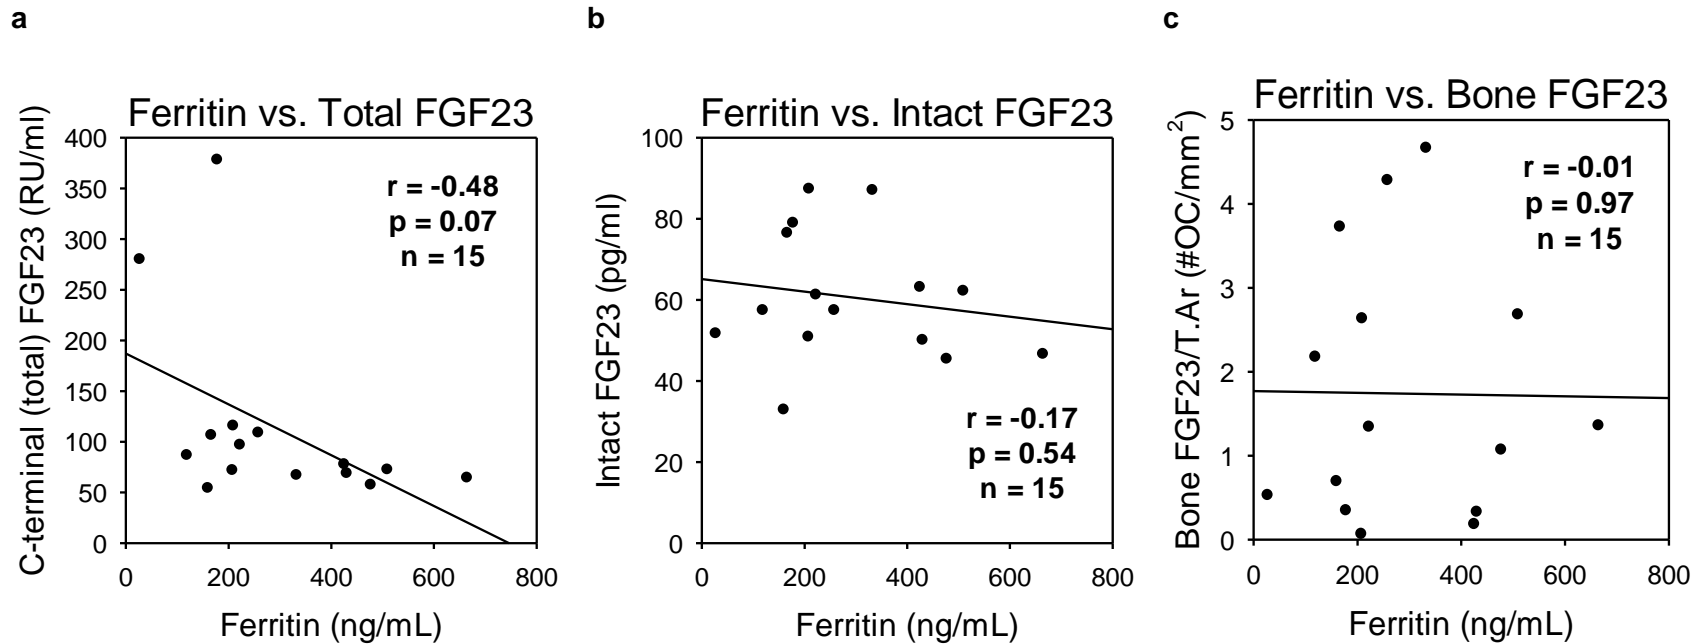

**Supplementary Figure S5: Associations among iron-related parameters in ADPKD subjects.** In patients with autosomal dominant polycystic kidney disease (ADPKD), serum erythropoietin (EPO) levels positively correlated with erythroferrone (ERFE) (**Figure S5a**), but ERFE did not correlate with hepcidin (**Figure S5b**). Serum ferritin positively correlated with hepcidin (**Figure S5c**).

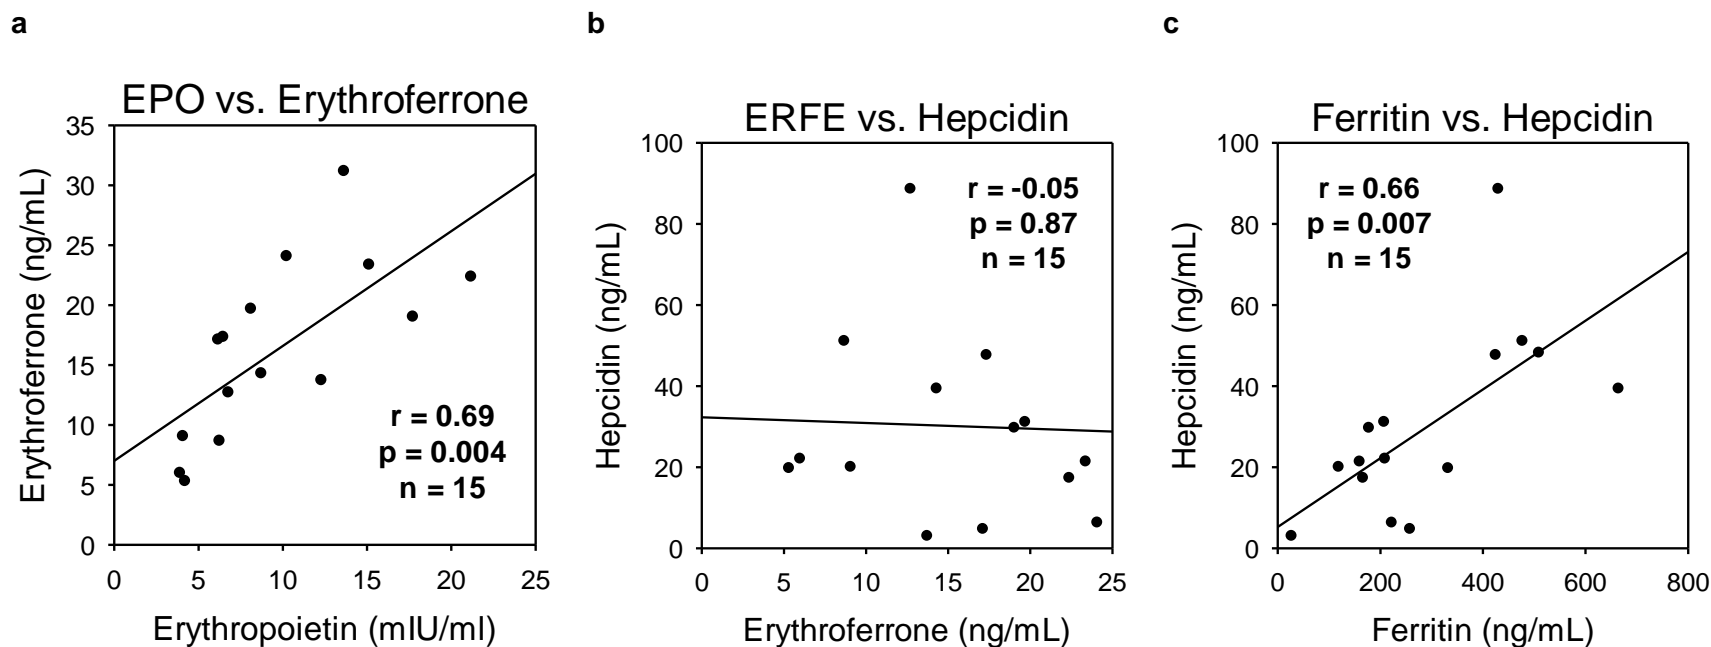

## **Methods:**

### *ADPKD HALT-PKD Study A Cohort*

This cohort included 78 ADPKD subjects from the HALT-PKD Study A.<sup>S22</sup> The University of Colorado Anschutz institutional review board and the HALT-PKD Study Executive Steering Committee approved this ancillary study. Study subjects were at least 20 years old, with eGFR of at least 60 mL/min/1.73m<sup>2</sup>. Demographic and anthropomorphic data were obtained from medical records. Kidney and liver volumes were calculated using magnetic resonance imaging data.

The entire Study A cohort included over 500 participants, recruited between 2006 and 2009. Serum intact FGF23 was previously measured in this group.<sup>S41</sup> The current 78 study subjects were selected based on the availability of serum samples in which to measure EPO and C-terminal (total) FGF23. All serum samples were drawn at the University of Colorado Anschutz Medical Campus in Denver, at the baseline visit (i.e. before any study-assigned treatment with angiotensin converting enzyme inhibitors or angiotensin receptor blockers). Most of the study subjects did not live in Colorado, so they traveled to Denver the day prior to the study visit.

From the serum samples, we measured C-terminal (total) FGF23, intact FGF23, EPO, creatinine, phosphate, calcium, intact PTH, 25-hydroxyvitamin D (25D), 1,25-dihydroxyvitamin D (1,25D), and 24,25-dihydroxyvitamin D (24,25D). Circulating total and intact FGF23 concentrations were measured via ELISA (Immutopics/Quidel, San Diego and Kainos, Japan, respectively). Serum EPO was measured via ELISA (R&D Systems, Minneapolis). Serum creatinine, phosphate, and calcium were measured by standard auto-analyzers. The eGFR was calculated using the Chronic Kidney Disease Epidemiology Collaboration (CKD-EPI) equation.

Intact PTH was assayed by a two-site immunoassay on a Beckman Unicell Dxl analyzer. Serum 25D was assayed using heptane extraction and liquid-chromatography-tandem mass spectrometry, and 1,25D and 24,25D were assayed by immunoaffinity purification and LC-MS/MS. Hemoglobin was measured by a standard hematology analyzer.

Categorical data are presented as numbers and percentages. Continuous data are presented as means and standard deviations. Pearson product-moment correlation coefficients and linear regression modeling were used to assess associations between serum EPO and FGF23 levels. Multiple linear regression modeling included the unadjusted model, a partially adjusted model (including the covariables of age, sex, eGFR, height adjusted total kidney volume, and liver volume), and a fully adjusted model (including the additional covariables of calcium, phosphate, PTH, 1,25D, and hemoglobin). Sensitivity analyses were performed, repeating the multiple linear regression modeling with log-transformed FGF23 values or outlier exclusion. Statistical analysis was performed using SigmaPlot 12.5 (San Jose, CA). P-values of <0.05 were considered statistically significant.

#### *ADPKD Bone Biopsy Cohort*

This cohort study included 15 adult ADPKD subjects (not from the HALT-PKD study) who underwent bone biopsies as part of a research protocol. Subjects were at least 21 years old, with eGFR of at least 60 mL/min/1.73m<sup>2</sup>. Thirteen subjects lived in Colorado, one lived in Oklahoma, and one lived in Texas. Subjects were recruited between 2013 and 2017 at the University of Colorado Anschutz Medical Campus and provided written informed consent. The protocol was approved by the Colorado Multiple Institution Review Board. Demographic and anthropomorphic data were obtained from the medical records.

We measured plasma C-terminal (total) FGF23; serum intact FGF23, EPO, creatinine, phosphate, calcium, PTH, 25D, 1,25D, and 24,25D; and whole blood hemoglobin, as described above. In this cohort, we additionally measured serum erythroferrone (ELISA, used as previously described),<sup>S42</sup> hepcidin (ELISA, used as previously described),<sup>S43</sup> ferritin (ELISA; Abcam, Cambridge, UK), and iron (colorimetric assay; Genzyme, Cambridge, MA). Iliac crest bone biopsies were performed, and bone FGF23 immunohistochemical staining was performed using an antibody directed against C-terminal FGF23. The total number of trabecular osteocytes with positive FGF23 staining was counted and normalized by the total tissue area analyzed (mm<sup>2</sup>). Pearson product-moment correlation coefficients were used to assess associations between variables.

### **Supplementary References:**

- S1. Torres VE, Harris PC, Pirson Y. Autosomal dominant polycystic kidney disease. *Lancet* (London, England) 2007;369:1287-301.
- S2. Shimada T, Kakitani M, Yamazaki Y, et al. Targeted ablation of Fgf23 demonstrates an essential physiological role of FGF23 in phosphate and vitamin D metabolism. *The Journal of clinical investigation* 2004;113:561-8.
- S3. Gutierrez O, Isakova T, Rhee E, et al. Fibroblast growth factor-23 mitigates hyperphosphatemia but accentuates calcitriol deficiency in chronic kidney disease. *Journal of the American Society of Nephrology : JASN* 2005;16:2205-15.
- S4. Isakova T, Wahl P, Vargas GS, et al. Fibroblast growth factor 23 is elevated before parathyroid hormone and phosphate in chronic kidney disease. *Kidney international* 2011;79:1370-8.
- S5. Portale AA, Wolf M, Juppner H, et al. Disordered FGF23 and mineral metabolism in children with CKD. *Clinical journal of the American Society of Nephrology : CJASN* 2014;9:344-53.
- S6. Fliser D, Kollerits B, Neyer U, et al. Fibroblast growth factor 23 (FGF23) predicts progression of chronic kidney disease: the Mild to Moderate Kidney Disease (MMKD) Study. *Journal of the American Society of Nephrology : JASN* 2007;18:2600-8.
- S7. Isakova T, Xie H, Yang W, et al. Fibroblast growth factor 23 and risks of mortality and end-stage renal disease in patients with chronic kidney disease. *Jama* 2011;305:2432-9.
- S8. Portale AA, Wolf MS, Messinger S, et al. Fibroblast Growth Factor 23 and Risk of CKD Progression in Children. *Clinical journal of the American Society of Nephrology : CJASN* 2016;11:1989-98.
- S9. Faul C, Amaral AP, Oskoueï B, et al. FGF23 induces left ventricular hypertrophy. *The Journal of clinical investigation* 2011;121:4393-408.
- S10. Saito H, Maeda A, Ohtomo S, et al. Circulating FGF-23 is regulated by 1 $\alpha$ ,25-dihydroxyvitamin D3 and phosphorus in vivo. *The Journal of biological chemistry* 2005;280:2543-9.
- S11. Antonucci DM, Yamashita T, Portale AA. Dietary phosphorus regulates serum fibroblast growth factor-23 concentrations in healthy men. *The Journal of clinical endocrinology and metabolism* 2006;91:3144-9.
- S12. Wesseling-Perry K, Pereira RC, Sahney S, et al. Calcitriol and doxercalciferol are equivalent in controlling bone turnover, suppressing parathyroid hormone, and increasing fibroblast growth factor-23 in secondary hyperparathyroidism. *Kidney international* 2011;79:112-9.
- S13. Lavi-Moshayoff V, Wasserman G, Meir T, Silver J, Naveh-Many T. PTH increases FGF23 gene expression and mediates the high-FGF23 levels of experimental kidney failure: a bone parathyroid feedback loop. *American journal of physiology Renal physiology* 2010;299:F882-9.
- S14. Shimada T, Yamazaki Y, Takahashi M, et al. Vitamin D receptor-independent FGF23 actions in regulating phosphate and vitamin D metabolism. *American journal of physiology Renal physiology* 2005;289:F1088-95.
- S15. David V, Martin A, Isakova T, et al. Inflammation and functional iron deficiency regulate fibroblast growth factor 23 production. *Kidney international* 2016;89:135-46.
- S16. Farrow EG, Yu X, Summers LJ, et al. Iron deficiency drives an autosomal dominant hypophosphatemic rickets (ADHR) phenotype in fibroblast growth factor-23 (Fgf23) knock-in mice. *Proceedings of the National Academy of Sciences of the United States of America* 2011;108:E1146-55.
- S17. Clinkenbeard EL, Farrow EG, Summers LJ, et al. Neonatal iron deficiency causes abnormal phosphate metabolism by elevating FGF23 in normal and ADHR mice. *Journal of*

- bone and mineral research : the official journal of the American Society for Bone and Mineral Research 2014;29:361-9.
- S18. Hanudel MR, Chua K, Rappaport M, et al. Effects of dietary iron intake and chronic kidney disease on fibroblast growth factor 23 metabolism in wild-type and hepcidin knockout mice. *American journal of physiology Renal physiology* 2016;311:F1369-f77.
- S19. Eckardt KU, Mollmann M, Neumann R, et al. Erythropoietin in polycystic kidneys. *The Journal of clinical investigation* 1989;84:1160-6.
- S20. Bernhardt WM, Wiesener MS, Weidemann A, et al. Involvement of hypoxia-inducible transcription factors in polycystic kidney disease. *The American journal of pathology* 2007;170:830-42.
- S21. Fernandez A, Hortal L, Rodriguez JC, Vega N, Plaza C, Palop L. Anemia in dialysis: its relation to acquired cystic kidney disease and serum levels of erythropoietin. *American journal of nephrology* 1991;11:12-5.
- S22. Chapman AB, Torres VE, Perrone RD, et al. The HALT polycystic kidney disease trials: design and implementation. *Clinical journal of the American Society of Nephrology : CJASN* 2010;5:102-9.
- S23. Cheong B, Muthupillai R, Rubin MF, Flamm SD. Normal values for renal length and volume as measured by magnetic resonance imaging. *Clinical journal of the American Society of Nephrology : CJASN* 2007;2:38-45.
- S24. Heinemann A, Wischhusen F, Puschel K, Rogiers X. Standard liver volume in the Caucasian population. *Liver transplantation and surgery : official publication of the American Association for the Study of Liver Diseases and the International Liver Transplantation Society* 1999;5:366-8.
- S25. Grote Beverborg N, Verweij N, Klip IT, et al. Erythropoietin in the general population: reference ranges and clinical, biochemical and genetic correlates. *PloS one* 2015;10:e0125215.
- S26. Benet-Pages A, Lorenz-Depiereux B, Zischka H, White KE, Econs MJ, Strom TM. FGF23 is processed by proprotein convertases but not by PHEX. *Bone* 2004;35:455-62.
- S27. Yamamoto H, Ramos-Molina B, Lick AN, et al. Posttranslational processing of FGF23 in osteocytes during the osteoblast to osteocyte transition. *Bone* 2016;84:120-30.
- S28. Kato K, Jeanneau C, Tarp MA, et al. Polypeptide GalNAc-transferase T3 and familial tumoral calcinosis. Secretion of fibroblast growth factor 23 requires O-glycosylation. *The Journal of biological chemistry* 2006;281:18370-7.
- S29. Tagliabracci VS, Engel JL, Wiley SE, et al. Dynamic regulation of FGF23 by Fam20C phosphorylation, GalNAc-T3 glycosylation, and furin proteolysis. *Proceedings of the National Academy of Sciences of the United States of America* 2014;111:5520-5.
- S30. Spichtig D, Zhang H, Mohebbi N, et al. Renal expression of FGF23 and peripheral resistance to elevated FGF23 in rodent models of polycystic kidney disease. *Kidney international* 2014;85:1340-50.
- S31. Zhang Q, Doucet M, Tomlinson RE, et al. The hypoxia-inducible factor-1alpha activates ectopic production of fibroblast growth factor 23 in tumor-induced osteomalacia. *Bone research* 2016;4:16011.
- S32. Wolf M, Koch TA, Bregman DB. Effects of iron deficiency anemia and its treatment on fibroblast growth factor 23 and phosphate homeostasis in women. *Journal of bone and mineral research : the official journal of the American Society for Bone and Mineral Research* 2013;28:1793-803.
- S33. Eisenga MF, van Londen M, Leaf DE, et al. C-Terminal Fibroblast Growth Factor 23, Iron Deficiency, and Mortality in Renal Transplant Recipients. *Journal of the American Society of Nephrology : JASN* 2017;28:3639-46.
- S34. Kautz L, Jung G, Valore EV, Rivella S, Nemeth E, Ganz T. Identification of erythroferrone as an erythroid regulator of iron metabolism. *Nature genetics* 2014;46:678-84.

- S35. Nemeth E, Tuttle MS, Powelson J, et al. Heparin regulates cellular iron efflux by binding to ferroportin and inducing its internalization. *Science (New York, NY)* 2004;306:2090-3.
- S36. Ganz T, Jung G, Naeim A, et al. Immunoassay for human serum erythropoietin. *Blood* 2017;130:1243-6.
- S37. Hanudel MR, Rappaport M, Chua K, et al. Levels of the erythropoietin-responsive hormone erythropoietin in mice and humans with chronic kidney disease. *Haematologica* 2018;103:e141-e2.
- S38. Pavik I, Jaeger P, Ebner L, et al. Soluble klotho and autosomal dominant polycystic kidney disease. *Clinical journal of the American Society of Nephrology : CJASN* 2012;7:248-57.
- S39. Evenepoel P, Claes K, Cavalier E, et al. A distinct bone phenotype in ADPKD patients with end-stage renal disease. *Kidney international* 2019;95:412-9.
- S40. El-Maouche D, Dumitrescu CE, Andreopoulou P, et al. Stability and degradation of fibroblast growth factor 23 (FGF23): the effect of time and temperature and assay type. *Osteoporosis international : a journal established as result of cooperation between the European Foundation for Osteoporosis and the National Osteoporosis Foundation of the USA* 2016;27:2345-53.
- S41. Chonchol M, Gitomer B, Isakova T, et al. Fibroblast Growth Factor 23 and Kidney Disease Progression in Autosomal Dominant Polycystic Kidney Disease. *Clinical journal of the American Society of Nephrology : CJASN* 2017;12:1461-9.
- S42. Ganz T, Jung G, Naeim A, et al. Immunoassay for human serum erythropoietin. *Blood* 2017.
- S43. Ganz T, Olbina G, Girelli D, Nemeth E, Westerman M. Immunoassay for human serum hepcidin. *Blood* 2008;112:4292-7.
